# Supplementary material for: Automated image registration of RGB, hyperspectral and chlorophyll fluorescence imaging data
Source: PubMed Central journal article supplement (PMC11572093; doi:10.1186/s13007-024-01296-y), 2024-11-17
Supplement: 13007_2024_1296_MOESM1_ESM.pdf [file 13007_2024_1296_MOESM1_ESM.pdf]

**Supplementary information 1: Parameters of the registration algorithms used**

| Method                      | References                                                                                                            | Preprocessing                                      | Modified parameter                                                     | Feature matching                                                                                      |
|-----------------------------|-----------------------------------------------------------------------------------------------------------------------|----------------------------------------------------|------------------------------------------------------------------------|-------------------------------------------------------------------------------------------------------|
| Phase correlation           | <a href="#">Ri &amp; Fujimoto (2018)</a>                                                                              | —                                                  | —                                                                      | —                                                                                                     |
| Phase correlation + ECC     | <a href="#">Ri &amp; Fujimoto (2018)</a><br><a href="#">Evangelidis&amp;Psarakis (2008)</a>                           | —                                                  | Max. Iteration:<br>10 000<br>Epsilon: 0.1                              | —                                                                                                     |
| ORB                         | <a href="#">Rublee et al. (2011)</a>                                                                                  | If no features found:<br>Try: Histogram stretching | Max. Features: 1000                                                    | Brute Force Matcher (BF) using the Hamming distance                                                   |
| ORB + ECC                   | <a href="#">Rublee et al (2011)</a><br><a href="#">Evangelidis&amp;Psarakis (2008)</a>                                | If no features found:<br>Try: Histogram stretching | Max. Features: 1000<br>Max. Iteration:<br>10 000<br>Epsilon: 0.1       | BF Matcher using the Hamming distance                                                                 |
| ORB<br>Parameter tuned      | <a href="#">Rublee et al. (2011)</a><br><a href="#">Lowe (2004)</a>                                                   | Histogram stretching                               | Max. Features:<br>100 000                                              | BF Matcher with K-Nearest Neighbors (k=2), distance filtering according to Lowe (2000) with ratio 0.8 |
| ORB<br>Parameter tuned +ECC | <a href="#">Rublee et al (2011)</a><br><a href="#">Lowe (2004)</a><br><a href="#">Evangelidis&amp;Psarakis (2008)</a> | Histogram stretching                               | Max. Features:<br>100 000<br>Max. Iteration:<br>10 000<br>Epsilon: 0.1 | BF Matcher with K-Nearest Neighbors (k=2), filtering according to Lowe (2000) with ratio 0.8          |
| NCC- adaptive approach      | In this study                                                                                                         | —                                                  | —                                                                      | —                                                                                                     |
