# Supplementary material for: Automated image registration of RGB, hyperspectral and chlorophyll fluorescence imaging data
Source: PubMed Central journal article supplement (PMC11572093; doi:10.1186/s13007-024-01296-y), 2024-11-17
Supplement: 13007_2024_1296_MOESM3_ESM.pdf [file 13007_2024_1296_MOESM3_ESM.pdf]

**Supplementary information 3: Calculated parameters/indices presented in the manuscript**

| Method                         | Definition                                           | Formula with wavelength [nm]                                                            | References                           |
|--------------------------------|------------------------------------------------------|-----------------------------------------------------------------------------------------|--------------------------------------|
| NDVI <sub>HSI</sub>            | Normalized Difference<br>Vegetation Index            | $= \frac{\bar{R}_{740-760} - \bar{R}_{660-680}}{\bar{R}_{740-760} + \bar{R}_{660-680}}$ | <a href="#">Rouse et al. (1974)</a>  |
| ARI <sub>1HSI</sub>            | Anthocyanin<br>Reflectance Index                     | $= \frac{1}{\bar{R}_{548-532}} - \frac{1}{\bar{R}_{698-702}}$                           | <a href="#">Gitelson et al. 2001</a> |
| CCI <sub>HSI</sub>             | Chlorophyll Carotenoid<br>Index                      | $= \frac{\bar{R}_{530-534} - \bar{R}_{628-632}}{\bar{R}_{530-534} + \bar{R}_{628-632}}$ | <a href="#">Gamon et al. 2016</a>    |
| NDVI <sub>ChIF</sub>           | Normalized Difference<br>Vegetation Index            | $= \frac{R_{730} - R_{660}}{R_{730} + R_{660}}$                                         | <a href="#">Rouse et al. (1974)</a>  |
| F <sub>v</sub> /F <sub>m</sub> | Max. quantum<br>efficiency of PSII<br>photochemistry | $= \frac{F_m - F_0}{F_m}$                                                               | <a href="#">Genty et al. (1989)</a>  |
| NPQ                            | Nonphotochemical<br>quenching                        | $= \frac{F_m - F_m'}{F_m'}$                                                             | <a href="#">Horton et al. (1996)</a> |

Note:  $\bar{R}$  indicating mean intensity at pixel level over several wavelength
